# Supplementary material for: A transcribed ultraconserved noncoding RNA, Uc.173, is a key molecule for the inhibition of lead-induced neuronal apoptosis
Source: PubMed Central journal article supplement (PMC4807986; doi:10.18632/oncotarget.6590), 2015-12-13
Supplement: oncotarget-07-0112-s001.pdf [file oncotarget-07-0112-s001.pdf]

## A transcribed ultraconserved noncoding RNA, Uc.173, is a key molecule for the inhibition of lead-induced neuronal apoptosis

### Supplementary Material

**Supplementary Table1.** qPCR primers and their sequences

| Gene            | Primer Sequence          |
|-----------------|--------------------------|
| Uc.173-F        | ACTTTTATTGCATGGTGTGAACT  |
| Uc.173-R        | CACTTGGAATAAATAACAAACAGG |
| GADPH-F         | AGGCCGGTGCTGAGTATGTC     |
| GADPH-R         | TGCCTGCTTCACCACCTTCT     |
| mmu-miR-186-5p  | CAAAGAATTCTCCTTTTGGGCT   |
| mmu-miR-208a-5p | GAGCTTTTGGCCCGGGTTATAC   |
| mmu-miR-291a-3p | AAAGTGCTTCCACTTTGTGTGC   |
| mmu-miR-294-3p  | AAAGTGCTTCCCTTTTGTGTGT   |
| mmu-miR-295-3p  | AAAGTGCTACTACTTTTGAGTCT  |
| mmu-miR-302a-3p | TAAGTGCTTCCATGTTTTGGTGA  |
| mmu-miR-302b-3p | TAAGTGCTTCCATGTTTTAGTAG  |
| mmu-miR-302c-3p | AAGTGCTTCCATGTTTCAGTGG   |
| mmu-miR-302d-3p | TAAGTGCTTCCATGTTTGAGTGT  |
| U6              | CTCGCTTCGGCAGCACA        |
